# Supplementary material for: SARS-CoV-2 phoenix: Empirical formulas and thermodynamic properties (enthalpy, entropy and Gibbs energy) of nucleocapsid, virus particle and biosynthesis of BA.2.86 Pirola variant
Source: Preprints.org preprint supplement (doi:10.20944/preprints202309.1964.v1), 2023-09-28
Supplement: Supplementary file 1 [file supplementary]

## SUPPLEMENTAL TABLE

### **Data Availability**

GISAID Identifier: EPI\_SET\_230924yd

doi: [10.55876/gis8.230924yd](https://doi.org/10.55876/gis8.230924yd)

All genome sequences and associated metadata in this dataset are published in GISAID's EpiCoV database. To view the contributors of each individual sequence with details such as accession number, Virus name, Collection date, Originating Lab and Submitting Lab and the list of Authors, visit [10.55876/gis8.230924yd](https://gisaid.org/230924yd)

### **Data Snapshot**

- EPI\_SET\_230924yd is composed of 1 individual genome sequences.
- The collection dates range from 2023-07-29 to 2023-07-29;
- Data were collected in 1 countries and territories;
- All sequences in this dataset are compared relative to hCoV-19/Wuhan/WIV04/2019 (WIV04), the official reference sequence employed by GISAID (EPI\_ISL\_402124). Learn more at <https://gisaid.org/WIV04>.
